# Supplementary material
Source: PubMed Central journal article supplement (PMC6788197)
Supplement: nl9b02351_si_001.pdf [file nl9b02351_si_001.pdf]

# Supporting Information

## Mass sensing for the advanced fabrication of nanomechanical resonators

G. Gruber, C. Urgell, A. Tavernarakis, A. Stavrinadis, S. Tepsic,  
C. Magén, S. Sangiao, J. M. de Teresa, P. Verlot, and A. Bachtold

### I. NON-LINEARITIES OBSERVED VIA E-BEAM ELECTROMECHANICAL COUPLING

Figure S1 shows how the spectrum determined by e-beam electromechanical coupling evolves during the deposition of Pt on a carbon nanotube. For this measurement, spectra were recorded every  $\approx 0.32$  s with a resolution bandwidth  $BW \approx 5$  kHz over a frequency span of  $\approx 400$  kHz. At each time step, multiple equidistantly-spaced peaks can be observed (labeled  $n = 1, 2, 3, \dots, 10$ ), which correspond to harmonics of the same fundamental mode. This clearly points out that the resonator is deep in the non-linear regime of the detection.<sup>1</sup> Furthermore, the graph shows an increase in the signal-to-noise ratio and peak intensities as the particle grows. This indicates an increase of the coupling strength of the e-beam electromechanical coupling due to a larger volume interacting with the e-beam and a higher secondary electron (SE) yield. Furthermore, it hints towards the presence of self-oscillations.<sup>1</sup>

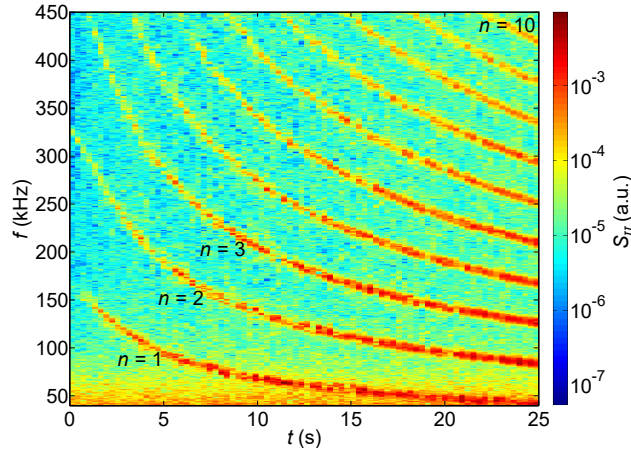

FIG. S1. Evolution of the spectra recorded via e-beam electromechanical coupling during the deposition of Pt on a carbon nanotube.

## II. OPTOMECHANICAL MEASUREMENT OF $f_{\text{res}}$

In order to confirm the resonance frequency  $f_{\text{res}}$  determined by e-beam electromechanical coupling, we conducted optomechanical measurements.<sup>2</sup> The measurement in Fig. S2 shows the thermally-driven peak with the resonance frequency  $f_{\text{res}} = 57.04$  kHz at room temperature. This value is reasonably close to the one observed using the e-beam electromechanical coupling  $f_{\text{res}} = 56.1$  kHz.

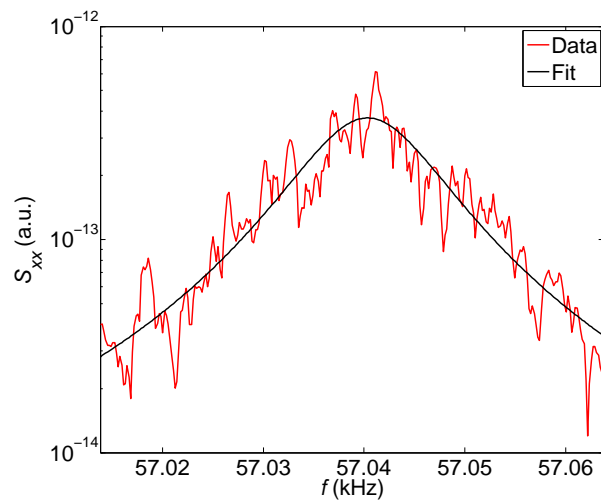

FIG. S2. Optomechanical measurement of the thermally-driven resonance peak (red) of the nanotube shown in Fig. 1 of the main text at room temperature and Lorentzian fit (black).

- 
- [1] Tsioutsios, I.; Tavernarakis, A.; Osmond, J.; Verlot, P.; Bachtold, A. *Nano Letters* **2017**, *17*, 1748.
- [2] Tavernarakis, A.; Stavrinadis, A.; Nowak, A.; Tsioutsios, I.; Bachtold, A.; Verlot, P. *Nature Communications* **2018**, *9*, 662.
